# Supplementary material for: Effect of Fluorescence Visualization–Guided Surgery on Local Recurrence of Oral Squamous Cell Carcinoma: A Randomized Clinical Trial
Source: PubMed Central journal article supplement (PMC7545352; doi:10.1001/jamaoto.2020.3147), 2020-10-08
Supplement: jamaotolaryngolheadnecksurg-e203147-s002.pdf [file jamaotolaryngolheadnecksurg-e203147-s002.pdf]

## Supplementary Online Content

Durham JS, Brasher P, Anderson DW, et al. Effect of fluorescence visualization–guided surgery on local recurrence of oral squamous cell carcinoma: a randomized clinical trial. *JAMA Otolaryngol Head Neck Surg*. Published online October 8, 2020. doi:10.1001/jamaoto.2020.3262

**eTable.** Adverse Events, Number of Patients (Events)

This supplementary material has been provided by the authors to give readers additional information about their work.

**eTable.** Adverse events, number of patients (events)

| <b>AE</b>                | <b>Grade 1</b> | <b>Grade 2</b> | <b>Grade 3</b> | <b>Grade 4</b> | <b>Grade 5</b> |
|--------------------------|----------------|----------------|----------------|----------------|----------------|
| <b>WL-guided (n=216)</b> | 192 (792)      | 102 (195)      | 19 (31)        | 1 (1)          | 38 (38)        |
| <b>FV-guided (n=227)</b> | 200 (804)      | 125 (219)      | 24 (37)        | 0 (0)          | 41 (41)        |

Grade 1: Mild; asymptomatic or mild symptoms; clinical or diagnostic observations only; intervention not indicated. Grade 2: Moderate; minimal, local or noninvasive intervention indicated; limiting age-appropriate instrumental activities of daily living (ADL). Grade 3: Severe or medically significant but not immediately life-threatening; hospitalization or prolongation of hospitalization indicated; disabling; limiting self care ADL. Grade 4: Life-threatening consequences; urgent intervention indicated. Grade 5: death related to adverse events (AE).

Abbreviations: WL, white light; FV, fluorescence visualization
