# Supplementary material for: Effect of Fluorescence Visualization–Guided Surgery on Local Recurrence of Oral Squamous Cell Carcinoma: A Randomized Clinical Trial
Source: PubMed Central journal article supplement (PMC7545352; doi:10.1001/jamaoto.2020.3147), 2020-10-08
Supplement: jamaotolaryngolheadnecksurg-e203147-s003.pdf [file jamaotolaryngolheadnecksurg-e203147-s003.pdf]

## Data Sharing Statement

Durham. Effect of Fluorescence Visualization-Guided Surgery on Local Recurrence of Oral Squamous Cell Carcinoma. *JAMA Otolaryngol Head Neck Surg*. Published October 08, 2020. 10.1001/jamaoto.2020.3147

### Data

**Data available:** No
